# Supplementary material for: Effect of the viscosity of poly(benzimidazole) on the performance of a multifunctional electrocatalyst with an ideal interfacial structure
Source: Royal Society of Chemistry journal article supplement (doi:10.1039/c3ta00165b), 2013-01-01
Supplement: c3ta00165b.pdf [file c3ta00165b.pdf]

# Effect of the Viscosity of Poly(benzimidazole) on the Performance of a Multifunctional Electrocatalyst with an Ideal Interfacial Structure

Beena K Balan <sup>a</sup>, Bipinlal Unni <sup>a</sup>, Harshal D Chaudhary <sup>b</sup>, Ulhas K Kharul <sup>b</sup> and Sreekumar Kurungot <sup>a\*</sup>

*Physical and Materials Chemistry Division, National Chemical Laboratory, Pune, India*

411008.

E-Mail: [k.sreekumar@ncl.res.in](mailto:k.sreekumar@ncl.res.in) Fax: +91 20 25902636 Tel: +91 20 25902566

## Supporting Information:

### Results

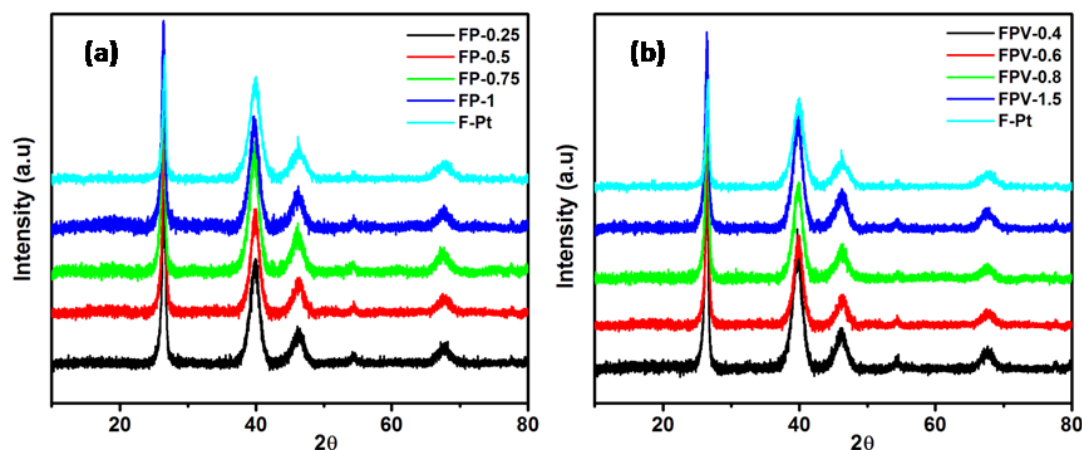

**Figure S1:** X-ray diffraction pattern obtained for (a) FP-0.25, FP-0.5, FP-0.75, FP-1 & F-Pt and (b) FPV-0.4, FPV-0.6, FPV-0.8 & FPV-1.5 & F-Pt.

**Table S1:** Calculated Pt loading in various catalyst materials after PBI-BuI incorporation

| Sample Name | P/C  | Initial Carbon (Wt.%) | Initial Pt Loading (Wt.%) | PBI-BuI (Wt.%) | Final Carbon (Wt.%) | New Pt Loading (Wt.%) |
|-------------|------|-----------------------|---------------------------|----------------|---------------------|-----------------------|
| FP-0.25     | 0.25 | 81.8                  | 18.2                      | 20             | 101.8               | 14.62436              |
| FP-0.5      | 0.5  | 81.8                  | 18.2                      | 40             | 121.8               | 12.22299              |
| FP-0.75     | 0.75 | 81.8                  | 18.2                      | 60             | 141.8               | 10.49901              |
| FPV-0.4     | 0.5  | 81.8                  | 18.2                      | 40             | 121.8               | 12.22299              |
| FPV-0.8     | 0.5  | 81.8                  | 18.2                      | 40             | 121.8               | 12.22299              |
| FPV-1.5     | 0.5  | 81.8                  | 18.2                      | 40             | 121.8               | 12.22299              |

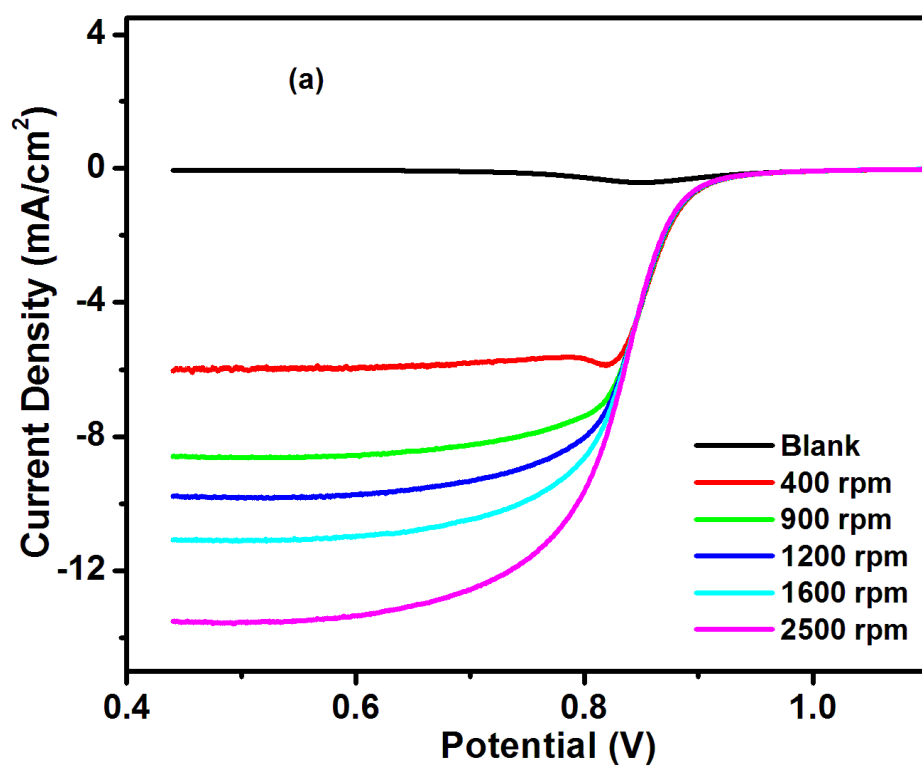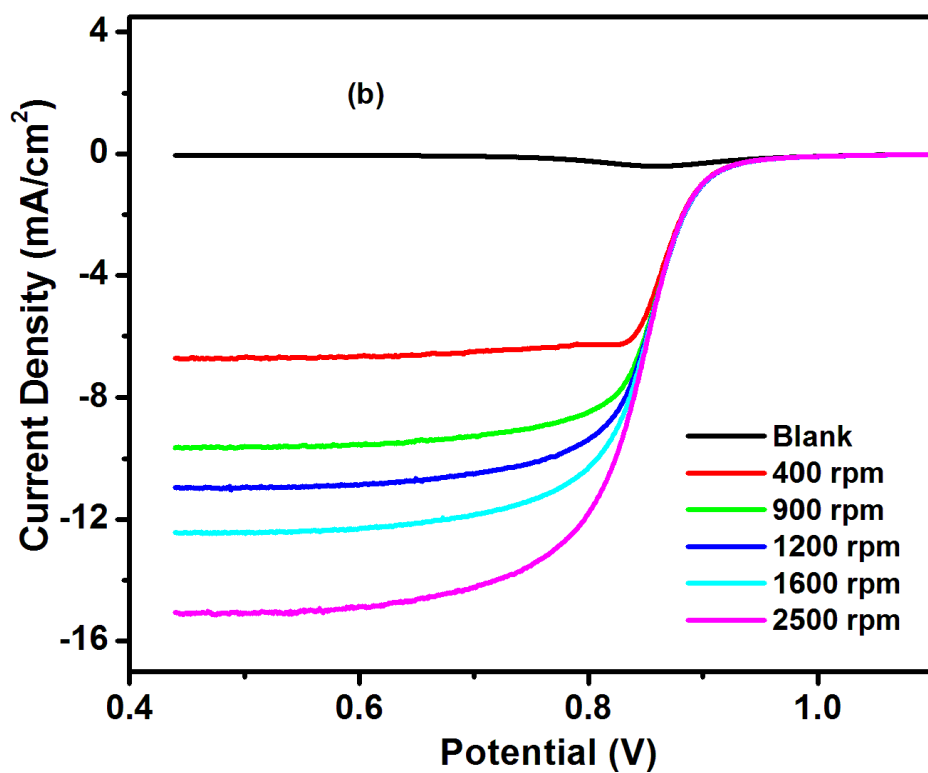

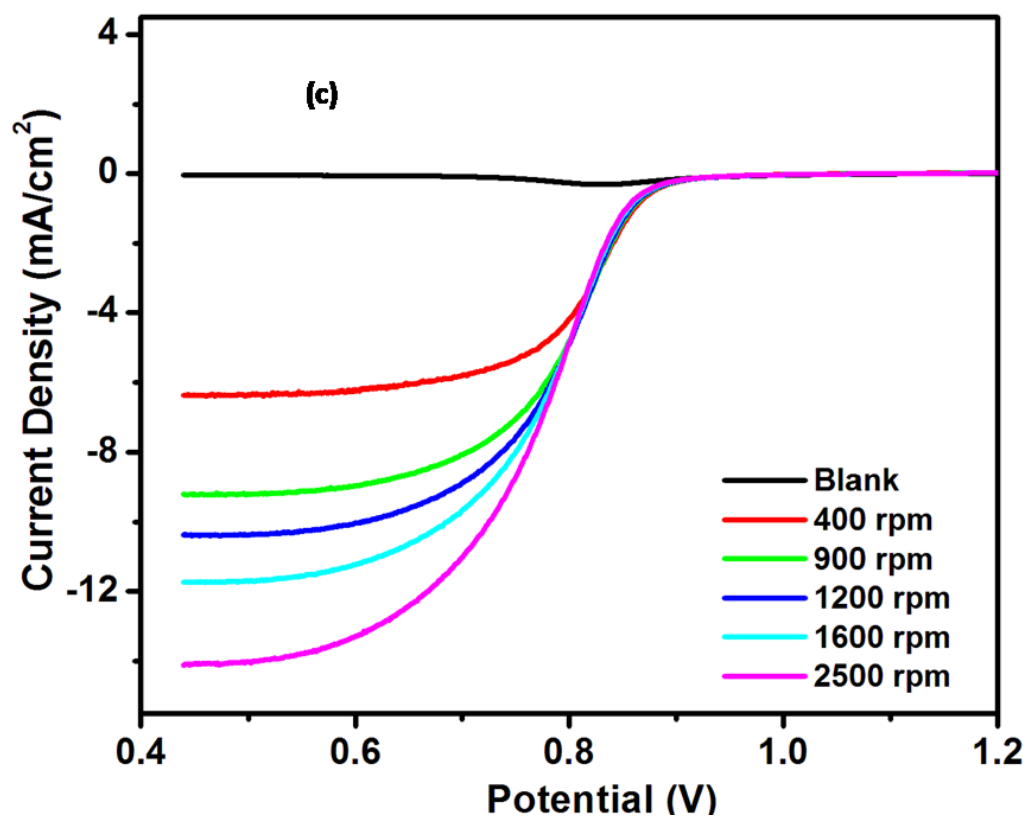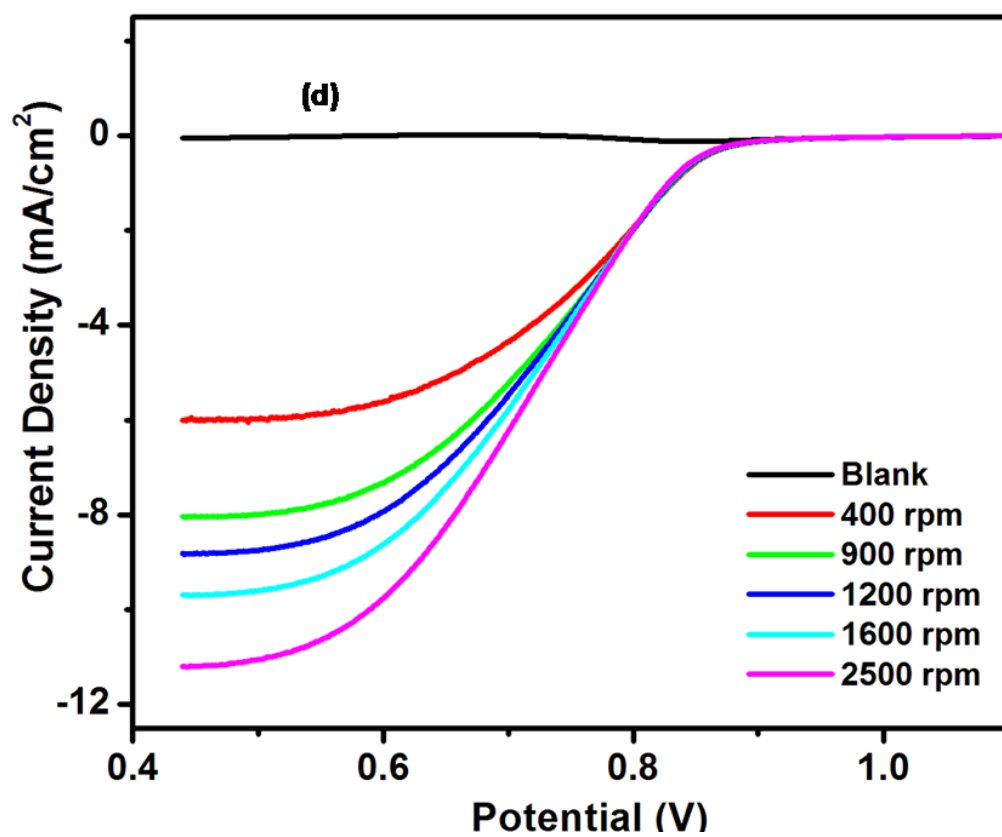

**Figure S2:** Linear sweep voltammograms obtained for (a) FPV-0.4 (b) FPV-0.6 (c) FPV-0.8 and (d) FPV-1.5 for ORR in 0.5 M HClO<sub>4</sub> at various rotating speeds from 400-2500 rpm at a scan rate of 5 mV/s.

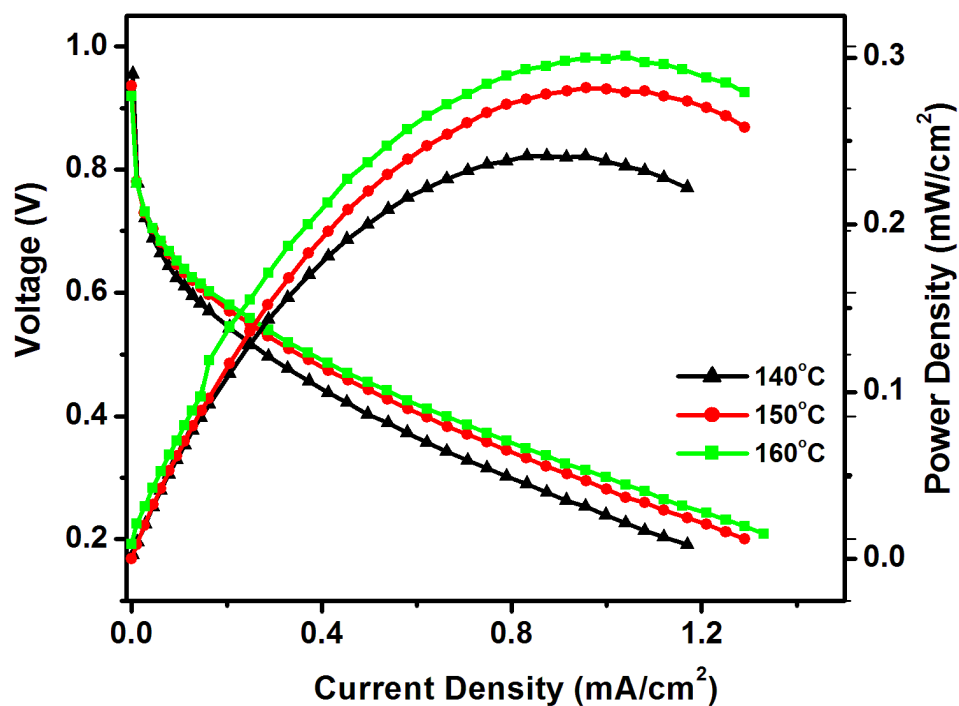

Figure S3: Single cell evaluation of the MEAs with the cathode electrodes formed from FPV-0.6 at temperatures 120, 140 and 160° C. Commercial 40 wt % Pt/C was used as the anode and Pt loadings of 0.30 and 0.20 mgPt cm<sup>-2</sup> were maintained in the cathode and anode, respectively.
